# Supplementary material for: The MAC revisited and updated
Source: Royal Society of Chemistry journal article supplement (doi:10.1039/c5ob01271f), 1997-01-01
Supplement: c5ob01271f1.pdf [file c5ob01271f1.pdf]

1  
2  
3  
4  
5  
6  
7  
8  
9  
10  
11  
12  
13  
14  
15  
16  
17  
18  
19  
20  
21  
22

**Electronic Supplementary Information**

**Dual functional peptide carrying *in vitro* selected catalytic  
and binding activities**

Liping Zhu,<sup>a</sup> Wei Wang,<sup>a</sup> HaixuZhao,<sup>b</sup> MuyeXu,<sup>a</sup> Seiichi Tada,<sup>a</sup> TakanoriUzawa,<sup>a, c</sup>

MingzheLiu,<sup>a, b</sup> and Yoshihiro Ito<sup>a, c</sup> \*

<sup>a</sup> Nano Medical Engineering Laboratory, RIKEN, 2-1 Hirosawa, Wako, Saitama, 351-0198, Japan

<sup>b</sup> Key Laboratory of Structure-Based Drugs Design & Discovery (Shenyang Pharmaceutical University) of Ministry of Education, School of Pharmaceutical Engineering, Shenyang Pharmaceutical University, Shenyang, 110016, China

<sup>c</sup> Emergent Bioengineering Materials Research Team, RIKEN Center for Emergent Matter Science, 2-1 Hirosawa, Wako, Saitama, 351-0198, Japan

\*Corresponding author. E-mail: [y-ito@riken.jp](mailto:y-ito@riken.jp)

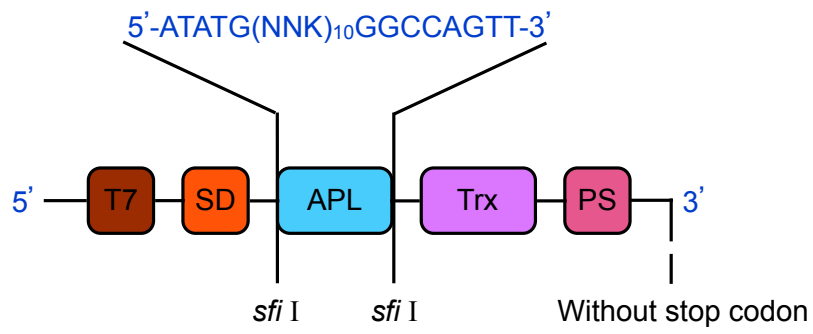

1

2 Fig. S1. Structure of DNA libraries.

3

4

5

6

7

8

9

10

11

12

13

14

15

16

17

18

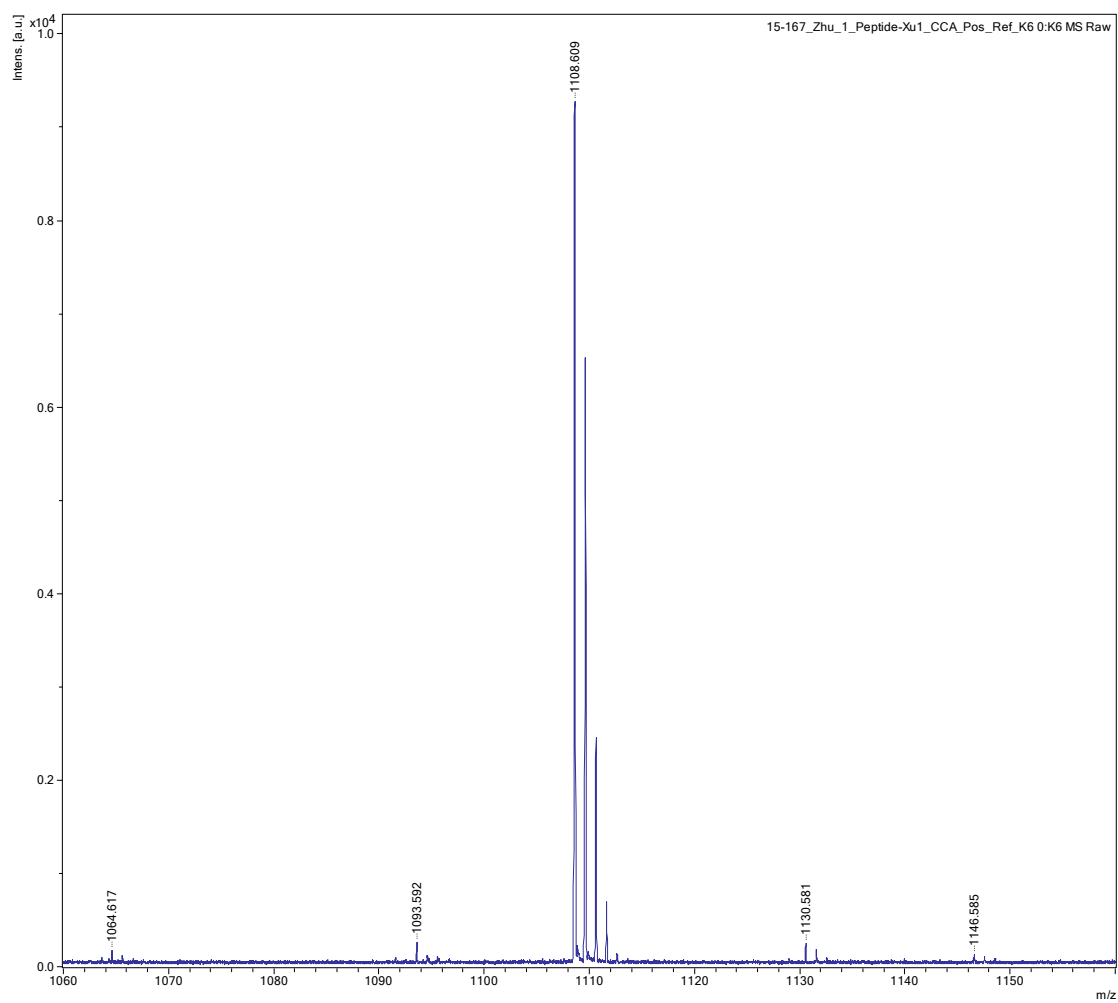

1

2 Fig. S2. MALDI-MS spectrum of Xu1 (calcd. for  $C_{52}H_{82}N_{15}O_{12}$   $[M+H]^+$  1108.6,  
3 found 1108.609).

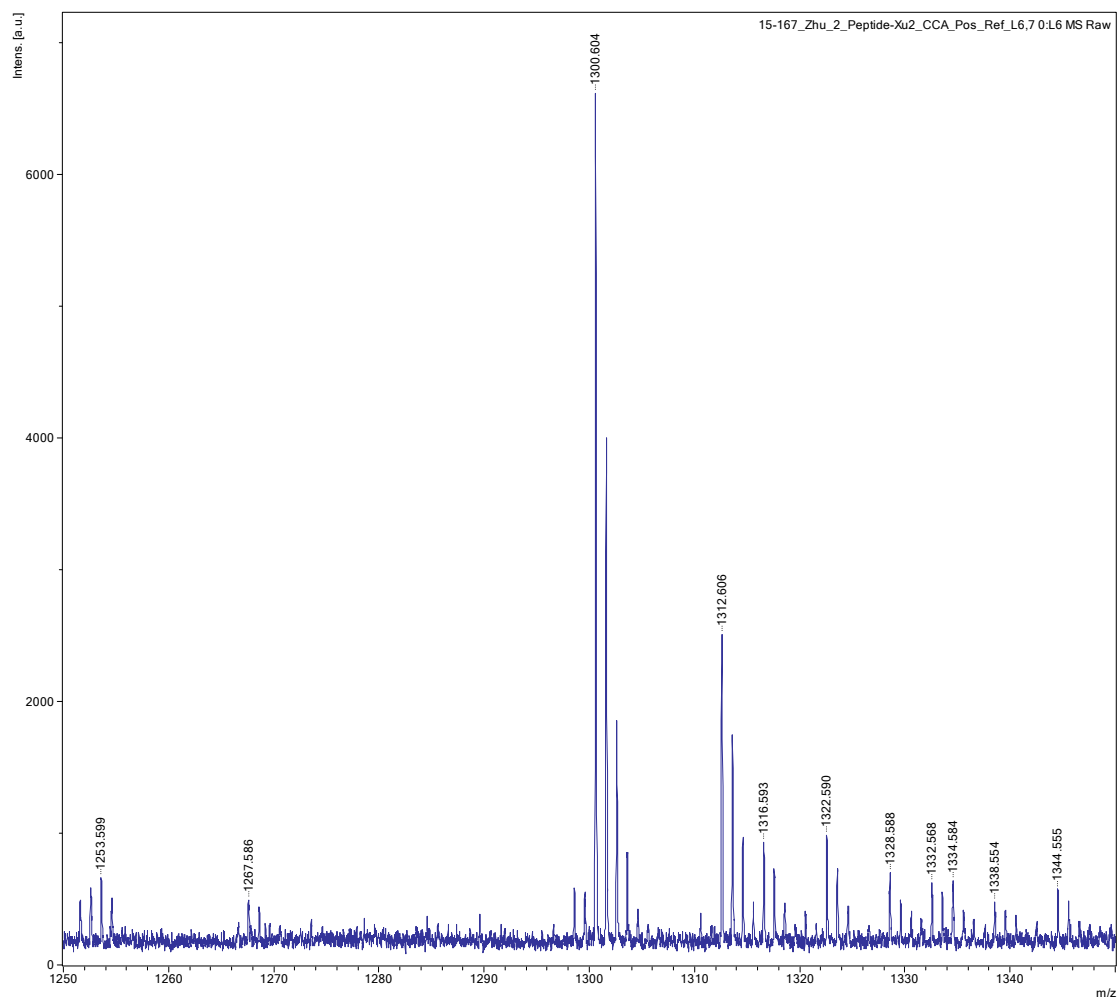

1

2 Fig. S3. MALDI-MS spectrum of Xu2 (calcd. for  $C_{63}H_{80}N_{11}O_{16}S [M+Na]^+$  1300.5,  
3 found 1300.604).

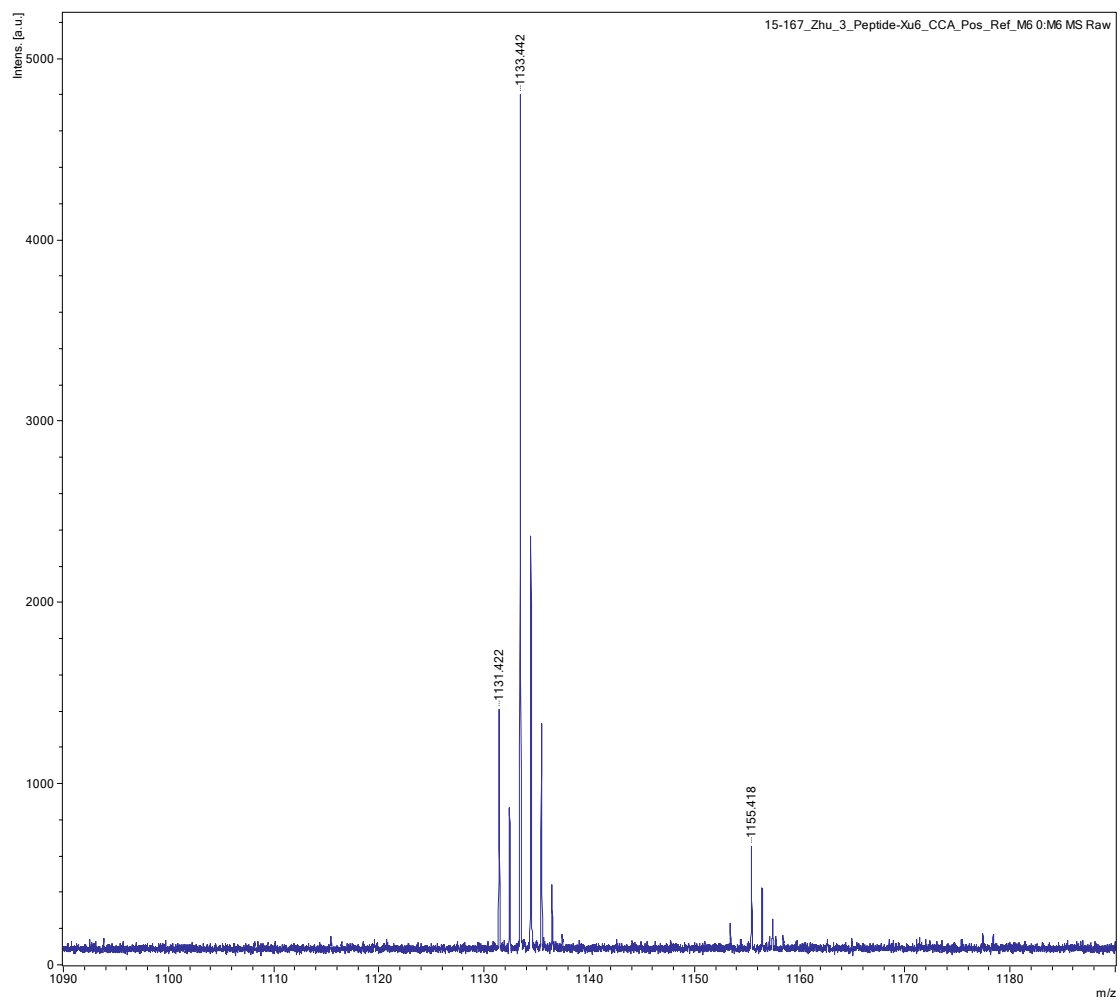

1

2 Fig. S4. MALDI-MS spectrum of Xu6 (calcd. for  $C_{43}H_{73}N_{16}O_{16}S_2 [M+H]^+$  1133.5,  
3 found 1133.442).

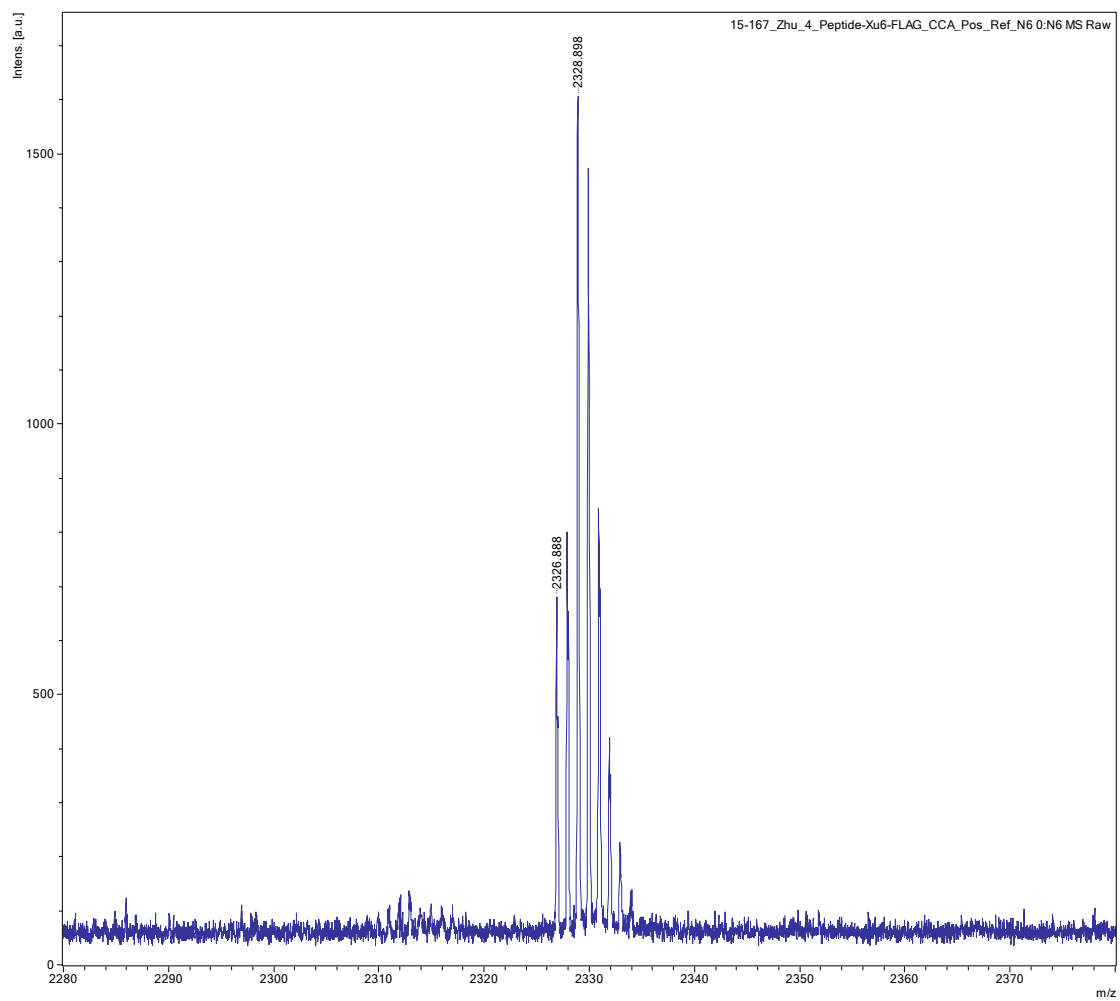

1

2 Fig. S5. MALDI-MS spectrum of Xu6-FLAG (calcd. for  $C_{91}H_{143}N_{30}O_{38}S_2 [M+H]^+$   
3 2329.5, found 2328.898).

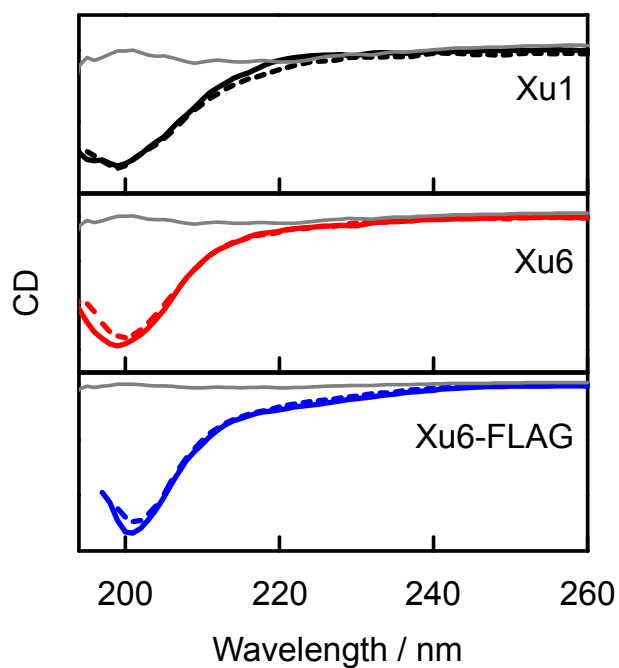

1

2 Fig. S6. CD spectra of 10 μM of peptide Xu1 (black), Xu6 (red) and Xu6-FLAG (blue)  
3 in the absence (solid line) and presence (dashed line) of 20 μM of hemin in reduced  
4 PBS buffer, where the contributions of hemin alone were subtracted. CD spectra of  
5 20-μM hemin are represented with gray lines.

6

7

8

9

10

11

12

13

14

15

| Peptide # | Sequence   | Peptide # | Sequence   | Peptide # | Sequence   |
|-----------|------------|-----------|------------|-----------|------------|
| 01        | CLPYCQRYWR | 20        | LEASILLARF | 39        | YFTSGLGHVT |
| 02        | TLGKCSYSVT | 21        | SDRHRIDVKL | 40        | WLTMSSLNS  |
| 03        | WVVALHWRAK | 22        | AYDYRFVWAL | 41        | PFFLIWLSRV |
| 04        | MVIPAEFESW | 23        | CAVVDWFYEF | 42        | HVSGFELETE |
| 05        | CMLSCCAIML | 24        | FSTLASEFYD | 43        | CVFPYSTKKL |
| 06        | MDNWWDFVNA | 25        | FTVIYDRFRS | 44        | DREIEKEALS |
| 07        | RLITQFPASL | 26        | GMSGHGCPQL | 45        | CYNCQMTSWT |
| 08        | YRLPHVVAPG | 27        | PEAYCILWYL | 46        | YCGSYDSHTL |
| 09        | YSSPKWNALL | 28        | IVVAPRSERK | 47        | VRVVVIKMM  |
| 10        | FLCLCSSLLS | 29        | YCLFCVDFG  | 48        | FLAGLSETFF |
| 11        | RMLQVMYFMR | 30        | DLVATSVFWW | 49        | YGSTYLSGML |
| 12        | ISYVHVYLDL | 31        | LPYEHLHCK  | 50        | SLTAEFSYSR |
| 13        | CAVVDWFYEF | 32        | GMLITMRLEL | 51        | SAECTRQCH  |
| 14        | ALSVLPERQG | 33        | AESVEASKFY | 52        | LPTRHTARTQ |
| 15        | ELMGGGDYKD | 34        | FRQAETTCHF | 53        | LEVTLAPNV  |
| 16        | MLVVVVIKIM | 35        | SLMRHMGDKV | 54        | MVISFDLGCL |
| 17        | VFHLVIPTLL | 36        | LLRPMSDTWL | 55        | MEDRWNDEKP |
| 18        | MISWFQWLLG | 37        | LVCYLSRLQS | 56        | RLMVSKLWTR |
| 19        | AMKVLRLNSW | 38        | CSWLRSMSKP | 57        | ICSGRADSKL |

1

2 Table S1. Sequence list of selected peptides.
